# Supplementary material for: Association between post-stroke depressiveness and the utilization of healthcare services three months after the stroke
Source: Springer Nature journal article supplement (doi:10.1038/s41598-025-12875-x), 2025-08-02
Supplement: MOESM1 [file 41598_2025_12875_MOESM1_ESM.pdf]

## **Supplementary material**

**Title: Association between post-stroke depressiveness and the utilization of healthcare services three months after the stroke event**

Raphaela Artner, Christine Meisinger, Michael Ertl, Markus Naumann, Jakob Linseisen\*, Timo Schmitz\*

\*shared last authorship

**Table S1:** Baseline characteristics of patients excluded due to missing values for the PHQ-9 score, patients excluded without 3-month follow-up, patients excluded due to missing values for relevant covariables and patients included into regression analyses.

| Variable                     | Total sample<br><i>n</i> =945 | Missing PHQ-9<br><i>n</i> =191 | No 3-month follow-up<br><i>n</i> =208 | Missing data on relevant covariables<br><i>n</i> =73 | Cases included into regression analyses<br><i>n</i> =473 | <i>p</i> -value  |
|------------------------------|-------------------------------|--------------------------------|---------------------------------------|------------------------------------------------------|----------------------------------------------------------|------------------|
| Sex                          |                               |                                |                                       |                                                      |                                                          |                  |
| Male                         | 531 (56.2)                    | 91 (47.6)                      | 118 (56.7)                            | 39 (53.4)                                            | 283 (59.8)                                               | <b>0.037</b>     |
| Female                       | 414 (43.8)                    | 100 (52.4)                     | 90 (43.3)                             | 34 (46.6)                                            | 190 (40.2)                                               |                  |
| Age in years<br>(mean, SD)   | 69.4 (13.1)                   | 73.7 (12.4)                    | 68.5 (14.4)                           | 67.4 (12.8)                                          | 68.4 (12.4)                                              | <b>&lt;0.001</b> |
| Living situation             |                               |                                |                                       |                                                      |                                                          |                  |
| Living with spouse/partner   | 494 (64.7)                    | 5 (55.6)                       | 112 (53.8)                            | 47 (64.4)                                            | 330 (69.8)                                               | <b>0.001</b>     |
| Living alone                 | 269 (35.3)                    | 4 (44.4)                       | 96 (46.2)                             | 26 (35.6)                                            | 143 (30.2)                                               |                  |
| BMI<br>(median, IQR)         | 26.3 (23.8 - 29.7)            | 26.1 (23.2 - 29.3)             | 25.9 (23.4 - 29.1)                    | 27.0 (24.2 - 29.4)                                   | 26.4 (23.9 - 30.2)                                       | 0.387            |
| Smoking                      |                               |                                |                                       |                                                      |                                                          |                  |
| Current smoker               | 125 (13.2)                    | 2 (1.0)                        | 43 (20.7)                             | 11 (15.1)                                            | 69 (14.6)                                                | <b>&lt;0.001</b> |
| Former smoker                | 344 (36.4)                    | 13 (6.8)                       | 91 (43.8)                             | 35 (47.9)                                            | 205 (43.3)                                               |                  |
| Never smoker                 | 476 (50.4)                    | 176 (92.1)                     | 74 (35.6)                             | 27 (37.0)                                            | 199 (42.1)                                               |                  |
| Comorbidities                |                               |                                |                                       |                                                      |                                                          |                  |
| Yes                          | 310 (39.5)                    | 13 (43.3)                      | 82 (39.4)                             | 32 (43.8)                                            | 183 (38.7)                                               | 0.828            |
| No                           | 474 (60.5)                    | 17 (56.7)                      | 126 (60.6)                            | 41 (56.2)                                            | 290 (61.3)                                               |                  |
| Etiology (TOAST)             |                               |                                |                                       |                                                      |                                                          |                  |
| large artery atherosclerosis | 223 (25.5)                    | 45 (24.9)                      | 47 (23.9)                             | 22 (33.3)                                            | 109 (25.4)                                               | 0.169            |
| cardioembolism               | 219 (25.1)                    | 46 (25.4)                      | 51 (25.9)                             | 22 (33.3)                                            | 100 (23.3)                                               |                  |
| small vessel disease         | 163 (18.7)                    | 29 (16.0)                      | 32 (16.2)                             | 8 (12.1)                                             | 94 (21.9)                                                |                  |

|                                                                 |                     |                    |                 |                    |                     |                  |
|-----------------------------------------------------------------|---------------------|--------------------|-----------------|--------------------|---------------------|------------------|
| other/undetermined                                              | 268 (30.7)          | 61 (33.7)          | 67 (34.0)       | 14 (21.2)          | 126 (29.4)          |                  |
| Stroke type                                                     |                     |                    |                 |                    |                     |                  |
| ischemic                                                        | 908 (96.1)          | 183 (95.8)         | 197 (94.7)      | 70 (95.9)          | 458 (96.8)          | 0.618            |
| hemorrhagic                                                     | 37 (3.9)            | 8 (4.2)            | 11 (5.3)        | 3 (4.1)            | 15 (3.2)            |                  |
| Former stroke                                                   |                     |                    |                 |                    |                     |                  |
| Yes                                                             | 625 (79.6)          | 22 (71.0)          | 169 (81.2)      | 58 (79.5)          | 376 (79.5)          | 0.620            |
| No                                                              | 160 (20.4)          | 9 (29.0)           | 39 (18.8)       | 15 (20.5)          | 97 (20.5)           |                  |
| NIHSS at hospital discharge (median, IQR)                       | 0.0 (0.0 - 2.0)     | 1.0 (0.0 - 2.0)    | 1.0 (0.0 - 2.0) | 1.0 (0.0 - 2.0)    | 0.0 (0.0 - 1.0)     | <b>&lt;0.001</b> |
| NIHSS at hospital discharge (mean, SD)                          | 1.3 (2.2)           | 1.9 (3.2)          | 1.7 (2.4)       | 1.6 (2.1)          | 0.9 (1.5)           | <b>&lt;0.001</b> |
| mRS at hospital discharge                                       |                     |                    |                 |                    |                     |                  |
| mRS score 0                                                     | 352 (37.8)          | 60 (31.9)          | 71 (34.1)       | 4 (6.6)            | 217 (45.9)          | <b>&lt;0.001</b> |
| mRS score 1                                                     | 219 (23.5)          | 40 (21.3)          | 39 (18.8)       | 20 (32.8)          | 120 (25.4)          |                  |
| mRS score 2                                                     | 156 (16.8)          | 24 (12.8)          | 31 (14.9)       | 21 (34.4)          | 80 (16.9)           |                  |
| mRS score 3                                                     | 109 (11.7)          | 27 (14.4)          | 35 (16.8)       | 11 (18.0)          | 36 (7.6)            |                  |
| mRS score 4-5                                                   | 94 (10.1)           | 37 (19.7)          | 32 (15.4)       | 5 (8.2)            | 20 (4.2)            |                  |
| activities of daily living 5 at <b>3-month-FU</b> (median, IQR) | 93.8 (81.2 - 100.0) | 79.2 (27.1 - 95.0) | not available   | 91.7 (79.2 - 97.9) | 95.8 (83.3 - 100.0) | <b>&lt;0.001</b> |
| Antidepressant medication at <b>3-month-FU</b>                  | 124 (13.1)          | 41 (21.5)          | not available   | 6 (8.2)            | 49 (10.4)           | <b>0.001</b>     |

**Table S2:** Results of the regression analyses including only patients aged 50 years and older.

|                                | Utilization of GPs <sup>1</sup> and/or internists <sup>a</sup> |                      |                 | Frequency of utilization of GPs and/or internists <sup>b</sup>     |             |                 |
|--------------------------------|----------------------------------------------------------------|----------------------|-----------------|--------------------------------------------------------------------|-------------|-----------------|
|                                | OR                                                             | 95 % CI <sup>4</sup> | <i>p</i> -value | Beta                                                               | 95 % CI     | <i>p</i> -value |
| <b>PHQ-9 score<sup>5</sup></b> | 1.06                                                           | 0.93 – 1.25          | 0.447           | 0.09                                                               | 0.00 - 0.19 | 0.068           |
|                                | Utilization of other physicians <sup>a</sup>                   |                      |                 | Utilization of therapy services <sup>a</sup>                       |             |                 |
|                                | OR                                                             | 95 % CI              | <i>p</i> -value | OR                                                                 | 95 % CI     | <i>p</i> -value |
| <b>PHQ-9 score</b>             | 1.06                                                           | 0.99 – 1.12          | 0.081           | 1.05                                                               | 0.99 – 1.11 | 0.087           |
|                                | Utilization of inpatient hospital treatment <sup>a</sup>       |                      |                 | Utilization of inpatient or outpatient rehabilitation <sup>a</sup> |             |                 |
|                                | OR                                                             | 95 % CI              | <i>p</i> -value | OR                                                                 | 95 % CI     | <i>p</i> -value |
| <b>PHQ-9 score</b>             | 1.07                                                           | 1.01 – 1.14          | <b>0.026</b>    | 1.11                                                               | 1.05 – 1.18 | <b>0.001</b>    |

<sup>a</sup> Binary logistic regression analysis

<sup>b</sup> Multivariable adjusted linear regression analysis with heteroskedasticity-consistent standard error HC3

<sup>1</sup> General practitioner

**Table S3:** Results of the logistic regression analyses for the outcomes utilization of psychiatrist/psychotherapist and use of antidepressant medication at 3-month follow-up.

|                    | Utilization of psychiatrist/psychotherapist |             |                 | Use of antidepressant medication |             |                  |
|--------------------|---------------------------------------------|-------------|-----------------|----------------------------------|-------------|------------------|
|                    | OR                                          | 95 % CI     | <i>p</i> -value | OR                               | 95 % CI     | <i>p</i> -value  |
| <b>PHQ-9 score</b> | 1.08                                        | 0.97 – 1.19 | 0.173           | 1.11                             | 1.05 – 1.17 | <b>&lt;0.001</b> |

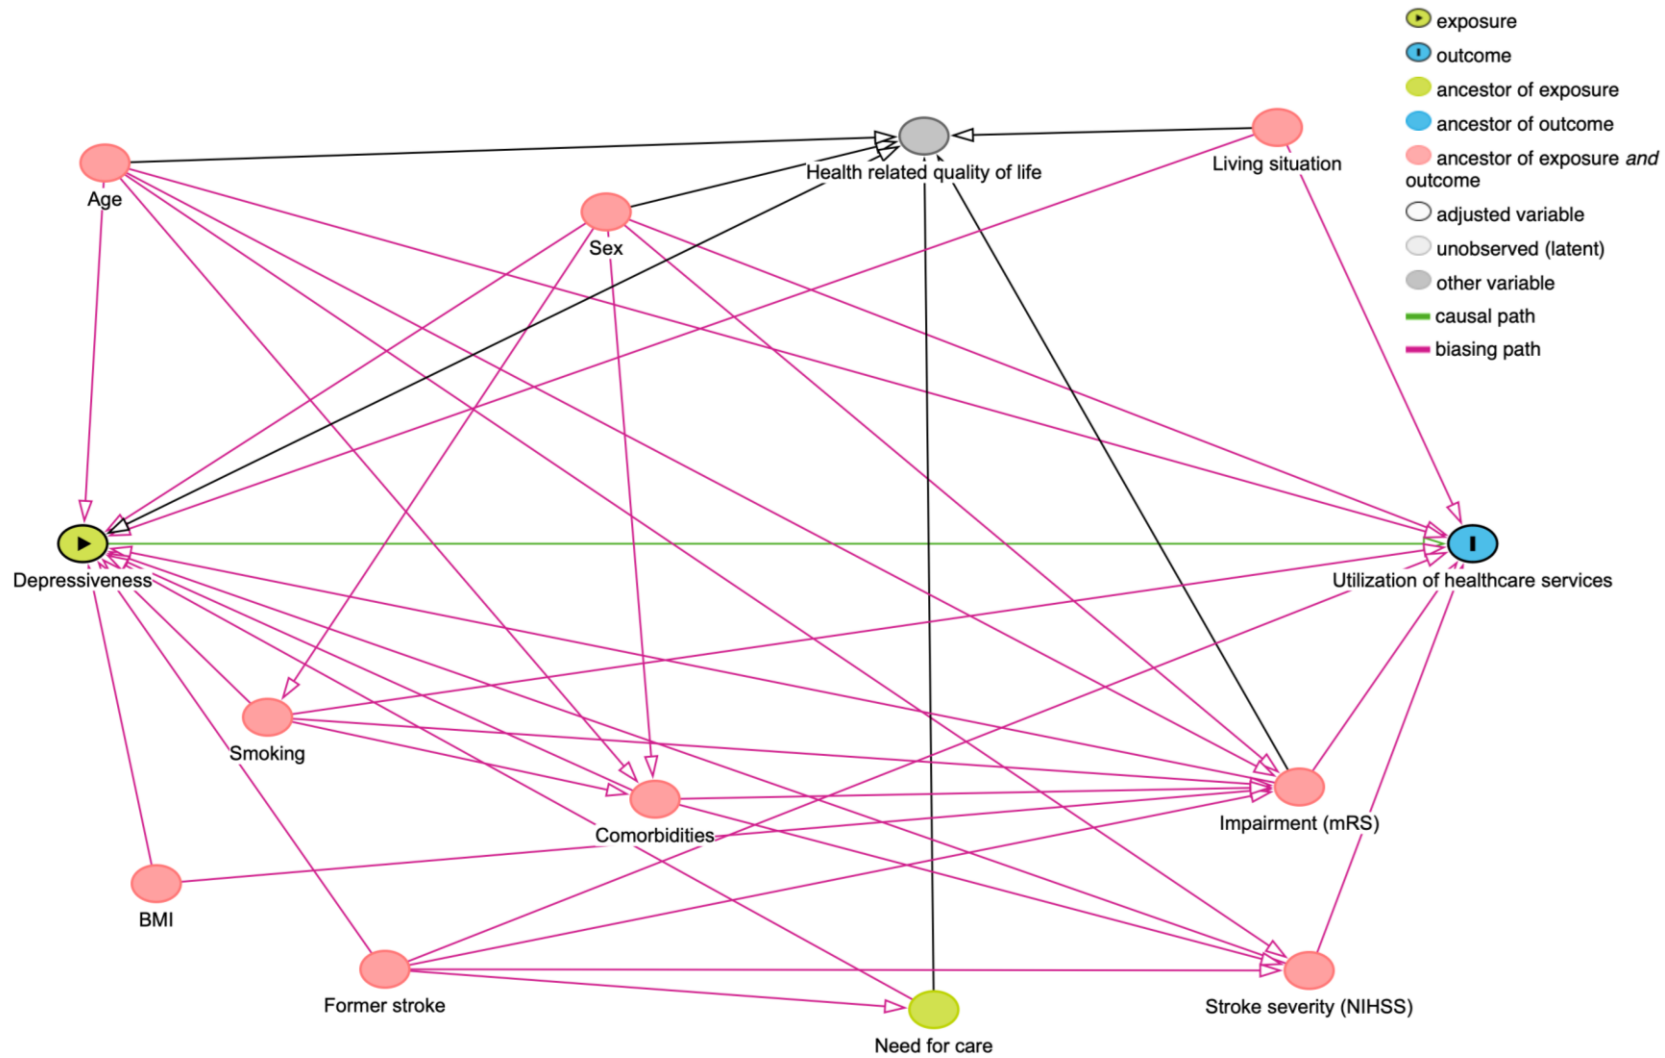

**Figure S1.** DAG of the direct effect of depressiveness, measured by the PHQ-9, at baseline survey on the utilization of healthcare services at the 3-month follow-up with covariables
